# Supplementary material for: Cationic Polymers as Transfection Reagents for Nucleic Acid Delivery
Source: MDPI journal article supplement (doi:10.3390/pharmaceutics15051502), 2023-05-15
Supplement: s1 [file s1]

# Supporting Information

## Cationic polymers as transfection reagents for nucleic acid delivery

Xiaomeng Cai<sup>1</sup>, Rui Dou<sup>1</sup>, Chen Guo<sup>1</sup>, Jiaruo Tang<sup>1</sup>, Xiajuan Li<sup>2</sup>, Jun Chen<sup>1,\*</sup>, Jiayu Zhang<sup>1,\*</sup>

1 CAS Key Laboratory for Biomedical Effects of Nanomaterials and Nanosafety, Multi-disciplinary Research Division, Institute of High Energy Physics and University of Chinese Academy of Sciences (UCAS), Chinese Academy of Sciences (CAS), Beijing 100049, China

2 Beijing Institute of Genomics, Chinese Academy of Sciences (CAS), China National Center for Bioinformation, Beijing 100101, China

\* Correspondence: chenjun@ihep.ac.cn (J.C.); zhangjy86@ihep.ac.cn (J.Z.)

**Table S1.** Chemical structures of different cationic polymers.

|                               |                                                                                      |
|-------------------------------|--------------------------------------------------------------------------------------|
| <p><b>DEAE-dextran</b></p>    | 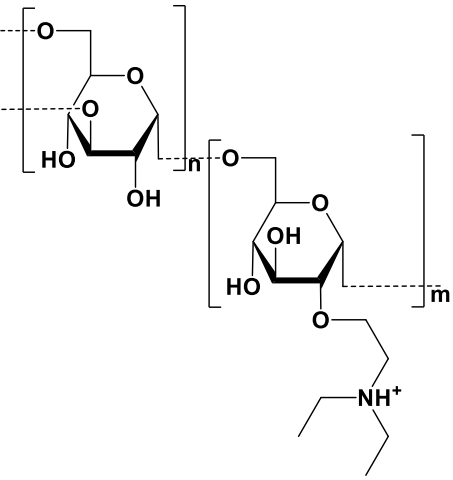   |
| <p><b>Poly-amino acid</b></p> |    |
| <p><b>PAMAM</b></p>           |   |
| <p><b>PPI</b></p>             |  |
| <p><b>PEI</b></p>             |  |
| <p><b>PDMAEMA</b></p>         |   |

|                  |                                                                                      |
|------------------|--------------------------------------------------------------------------------------|
| PBAE             | 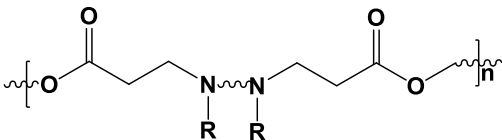   |
| PHP              |     |
| PAGA             |     |
| PVL              |    |
| Aminated<br>PAHA |   |
| PPE              |  |
| Poly lactide     |   |
| Poly carbonate   |   |
| Polyurethane     |  |
| Histone          | N/A                                                                                  |

|               |                                                                                      |
|---------------|--------------------------------------------------------------------------------------|
| Gelatin       | 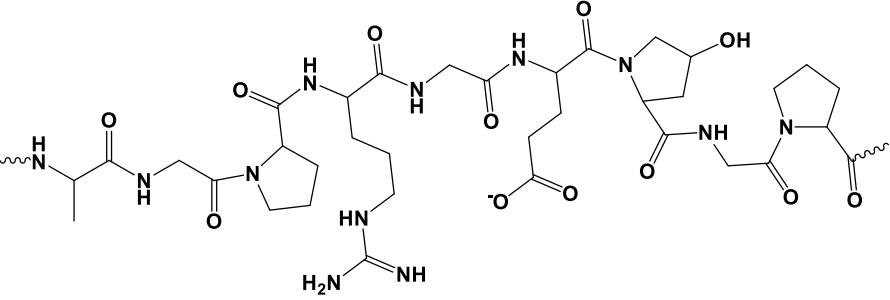   |
| Protamine     | N/A                                                                                  |
| Cyclodextrins |   |
| Chitosan      |  |

**Table S2.** Clinical trials with cationic polymers.

| <b>Cationic polymers</b> | <b>Condition</b>                                                                                                            | <b>Nuclei acids</b> | <b>Number</b>          | <b>State</b> |
|--------------------------|-----------------------------------------------------------------------------------------------------------------------------|---------------------|------------------------|--------------|
| PEI                      | Relapsed Neuroblastoma                                                                                                      | DNA                 | NCT04049864            | Recruiting   |
|                          | Advanced Solid Tumors                                                                                                       | MK-4621             | NCT03739138            | Terminated   |
|                          | Pancreatic Adenocarcinoma                                                                                                   | DNA                 | NCT01274455            | Completed    |
|                          | Cutaneous Squamous Cell Carcinoma<br>Basal Cell Carcinoma                                                                   | DNA                 | NCT04925713            | Completed    |
|                          | Merkel Cell Carcinoma<br>Cutaneous Squamous Cell Carcinoma<br>Non-Melanoma Skin Cancers                                     | DNA                 | NCT04160065            | Recruiting   |
|                          | Cutaneous Melanoma, Stage III<br>Cutaneous Melanoma, Stage IV<br>Merkel Cell Carcinoma<br>Cutaneous Squamous Cell Carcinoma | DNA                 | NCT04853602            | Available    |
|                          | Pancreatic Adenocarcinoma                                                                                                   | DNA                 | NCT02806687            | Completed    |
|                          | Malignant Melanoma                                                                                                          | mRNA                | NCT00204607            | Completed    |
|                          | Prostate Cancer                                                                                                             | mRNA                | NCT01817738            | Terminated   |
|                          | Rabies                                                                                                                      | mRNA                | NCT02241135            | Completed    |
| Protamine                | Non-Small Cell Lung Cancer                                                                                                  | mRNA                | NCT00923312            | Completed    |
|                          | Non-Small Cell Lung Carcinoma                                                                                               | mRNA                | NCT01915524            | Terminated   |
|                          | Hormone-refractory prostate cancer                                                                                          | mRNA                | EudraCT-2008-003967-37 | Completed    |
